# Supplementary material for: OsGRAS23, a rice GRAS transcription factor gene, is involved in drought stress response through regulating expression of stress-responsive genes
Source: Springer Nature journal article supplement (doi:10.1186/s12870-015-0532-3), 2015-06-12
Supplement: 12870_2015_532_MOESM2_ESM.pdf [file 12870_2015_532_MOESM2_ESM.pdf]

**Table S1. Micro-array analysis of OsGRAS23-overexpressing rice plants.** Genes which were up-regulated greater than 2-fold or down-regulated lower than 0.5 in overexpression lines compared with WT were listed.

| Probeset ID        | Gene Symbol  | Fold-Change<br>(OE1-N vs.<br>WT-N) | Fold-Change<br>(OE1-D vs.<br>WT-D) | Fold-Change<br>(WT-D vs.<br>WT-N) | Annotation                                              |
|--------------------|--------------|------------------------------------|------------------------------------|-----------------------------------|---------------------------------------------------------|
| Os.8823.1.S1_at    | Os03g0115800 | 59.487                             | 35.164                             | 1.228                             | Conserved hypothetical protein                          |
| Os.10660.1.S1_at   | Os07g0162450 | 30.558                             | 38.046                             | 0.842                             | Conserved hypothetical protein                          |
| Os.10266.1.S1_at   | Os03g0629800 | 24.165                             | 18.122                             | 0.981                             | Conserved hypothetical protein                          |
| Os.46431.1.S1_at   | Os01g0537250 | 10.026                             | 12.857                             | 0.606                             | Conserved hypothetical protein                          |
| Os.2254.1.S1_at    | Os07g0129700 | 7.244                              | 1.703                              | 13.664                            | OSH15 protein (Homeobox gene)                           |
| Os.44418.1.S1_at   | Os07g0212400 | 6.848                              | 3.933                              | 0.915                             | Conserved hypothetical protein                          |
| Os.6863.1.S1_s_at  | Os12g0247700 | 6.126                              | 0.767                              | 8.469                             | Similar to Jasmonate-induced protein                    |
| Os.20501.1.S1_at   | Os07g0673900 | 5.990                              | 3.928                              | 1.349                             | Hypoxia induced protein conserved region family protein |
| Os.20614.1.S1_at   | Os10g0567900 | 5.407                              | 5.687                              | 0.573                             | HAT dimerisation domain containing protein              |
| Os.9273.1.S1_x_at  | Os12g0548650 | 4.834                              | 1.314                              | 12.525                            | Proteinase inhibitor I13 containing protein             |
| Os.54304.1.S1_at   | Os04g0173800 | 4.509                              | 0.944                              | 4.166                             | Lectin precursor                                        |
| Os.151.2.S1_at     | Os03g0727000 | 4.508                              | 3.347                              | 1.612                             | Similar to Homeobox protein OSH1                        |
| Os.17112.1.S1_at   | Os03g0289800 | 4.420                              | 1.222                              | 16.545                            | Similar to Leucoanthocyanidin dioxygenase-like protein  |
| Os.12639.1.A1_at   | Os11g0213000 | 4.415                              | 3.329                              | 1.270                             | Protein kinase domain containing protein                |
| Os.47730.2.S1_x_at | Os11g0125900 | 4.143                              | 0.946                              | 2.225                             | Conserved hypothetical protein                          |
| Os.55779.1.S1_at   | Os09g0552500 | 3.894                              | 1.225                              | 2.536                             | Cupin 1 domain containing protein                       |
| Os.4162.1.S1_at    | Os05g0129700 | 3.865                              | 1.766                              | 2.348                             | KNOX class homeodomain protein                          |

|                        |                     |       |        |        |                                                         |
|------------------------|---------------------|-------|--------|--------|---------------------------------------------------------|
| Os.151.1.S1_x_at       | Os03g0727000        | 3.816 | 1.924  | 2.523  | Similar to Homeobox protein OSH1                        |
| Os.55859.1.S1_at       | Os04g0308500        | 3.761 | 1.246  | 14.271 | unknown                                                 |
| Os.5045.1.S1_at        | <i>Os01g0127600</i> | 3.753 | 1.149  | 5.044  | Similar to Bowman-Birk type proteinase inhibitor        |
| Os.23219.1.S1_at       | Os01g0726700        | 3.651 | 2.053  | 4.360  | Conserved hypothetical protein                          |
| Os.9836.1.S1_at        | Os11g0211800        | 3.633 | 1.243  | 10.935 | Conserved hypothetical protein                          |
| Os.57548.1.S1_at       | Os12g0152000        | 3.591 | 1.320  | 2.646  | Similar to Terminal flower 1-like protein               |
| Os.11218.1.S1_at       | Os07g0638400        | 3.560 | 11.286 | 1.485  | Similar to 1-Cys peroxiredoxin                          |
| Os.50413.1.S1_at       | Os04g0107600        | 3.512 | 1.312  | 6.472  | Arginine decarboxylase                                  |
| Os.57103.1.S1_at       | Os02g0121700        | 3.401 | 0.994  | 8.781  | Terpene synthase-like domain containing protein         |
| Os.50352.1.S1_at       | Os04g0223500        | 3.400 | 1.709  | 3.274  | FAD dependent oxidoreductase family protein             |
| OsAffx.11552.1.S1_at   | Os01g0705400        | 3.321 | 1.468  | 0.846  | Conserved hypothetical protein                          |
| Os.52974.1.S1_at       | Os04g0597600        | 3.288 | 1.847  | 3.137  | TGF-beta receptor, type I/II extracellular region       |
| Os.49030.1.A1_s_at     | Os09g0367700        | 3.268 | 2.984  | 5.550  | Similar to GST6 protein                                 |
| Os.54864.2.S1_at       | Os06g0200800        | 3.218 | 4.119  | 1.266  | Conserved hypothetical protein                          |
| Os.49324.1.S1_at       | Os04g0525200        | 3.214 | 1.038  | 2.362  | UDP-glucuronosyl/UDP-glucosyltransferase family         |
| OsAffx.26447.3.S1_at   | Os04g0516200        | 3.209 | 1.630  | 1.544  | Protein of unknown function DUF640 domain               |
| OsAffx.19820.1.S1_at   | Os12g0441300        | 3.188 | 1.609  | 1.333  | Similar to Flavonoid 4'-O-methyltransferase             |
| Os.6450.1.S1_at        | Os07g0190000        | 3.180 | 0.763  | 6.731  | Similar to 1-deoxy-D-xylulose 5-phosphate synthase      |
| Os.27292.1.A1_at       | Os04g0525100        | 3.122 | 1.405  | 6.583  | UDP-glucuronosyl/UDP-glucosyltransferase family protein |
| Os.4223.1.S1_s_at      | Os06g0168700        | 3.115 | 1.376  | 2.447  | Similar to Prolin rich protein                          |
| Os.9169.1.S1_x_at      | Os12g0548700        | 3.100 | 1.403  | 5.050  | Transferase family protein                              |
| Os.52173.1.S1_at       | Os12g0458100        | 3.055 | 1.109  | 2.684  | Transferase family protein                              |
| Os.12713.1.S2_a_at     | Os01g0124000        | 3.049 | 1.127  | 2.910  | Similar to Bowman Birk trypsin inhibitor                |
| OsAffx.16673.1.S1_s_at | Os07g0604700        | 3.045 | 3.647  | 1.734  | B12D family protein                                     |
| Os.26820.1.A1_s_at     | Os08g0167800        | 2.985 | 1.055  | 1.375  | Terpenoid cylases/protein prenyltransferase             |

|                        |              |       |       |        |                                                 |
|------------------------|--------------|-------|-------|--------|-------------------------------------------------|
| Os.15171.1.S1_s_at     | Os12g0559200 | 2.876 | 0.990 | 2.933  | Lipoxygenase                                    |
| OsAffx.32261.1.A1_at   | Os01g0881700 | 2.868 | 2.588 | 1.256  | Similar to Apocytochrome f precursor            |
| OsAffx.30784.1.S1_at   | Os11g0117600 | 2.832 | 1.639 | 2.459  | Similar to WRKY transcription factor 50         |
| Os.47601.1.A1_at       | Os12g0228700 | 2.811 | 1.371 | 3.296  | Similar to Jasmonate-induced protein            |
| Os.54358.1.S1_at       | Os11g0282700 | 2.797 | 1.854 | 0.977  | Homeodomain-like containing protein             |
| Os.53328.1.S1_at       | Os09g0543900 | 2.761 | 2.066 | 2.030  | Transferase family protein                      |
| Os.49726.1.S1_at       | Os11g0152500 | 2.744 | 1.460 | 1.506  | PEBP family protein                             |
| Os.11510.1.S1_s_at     | Os09g0491100 | 2.737 | 1.951 | 1.612  | Similar to Beta-primeverosidase                 |
| Os.264.1.S1_at         | Os04g0689000 | 2.689 | 1.503 | 2.723  | Similar to Peroxidase                           |
| Os.11812.1.S1_at       | Os02g0719600 | 2.684 | 1.118 | 6.043  | SAM dependent carboxyl methyltransferase family |
| OsAffx.30784.1.S1_s_at | Os11g0117600 | 2.660 | 1.766 | 1.907  | WRKY transcription factor 50                    |
| Os.29056.1.S2_at       | Os01g0881700 | 2.628 | 2.504 | 1.444  | Conserved hypothetical protein                  |
| Os.2289.1.S1_at        | Os12g0582700 | 2.622 | 0.933 | 5.074  | Cytochrome P450 family protein                  |
| Os.46471.1.S1_at       | Os10g0347000 | 2.604 | 1.530 | 1.234  | X8 domain containing protein                    |
| OsAffx.2978.2.S1_s_at  | Os05g0129700 | 2.599 | 1.141 | 2.098  | KNOX class homeodomain protein                  |
| Os.405.1.S1_a_at       | Os12g0559200 | 2.589 | 0.998 | 2.491  | Lipoxygenase                                    |
| Os.15801.1.S1_x_at     | Os11g0126800 | 2.577 | 1.989 | 0.835  | Nucleoside phosphatase GDA1/CD39 family protein |
| Os.12642.1.S1_at       | Os08g0540400 | 2.576 | 1.723 | 3.040  | Calcium-dependent protein kinase                |
| Os.6645.1.S1_s_at      | Os07g0432201 | 2.572 | 1.589 | 1.906  | Conserved hypothetical protein                  |
| Os.53667.1.S1_at       | Os06g0546500 | 2.561 | 1.557 | 1.892  | Class III peroxidase GvPx2b                     |
| Os.50805.1.S1_at       | Os08g0297800 | 2.555 | 1.061 | 2.780  | Sulfotransferase family protein                 |
| Os.7095.1.S1_at        | Os04g0581100 | 2.550 | 1.528 | 23.425 | Isopenicillin N synthase family protein         |
| OsAffx.26673.1.S1_at   | Os05g0100100 | 2.542 | 1.453 | 1.036  | Conserved hypothetical protein                  |
| Os.54959.1.S1_at       | Os03g0671800 | 2.540 | 1.844 | 1.868  | Basic helix-loop-helix dimerisation region bHLH |
| Os.49663.1.S1_at       | Os02g0602000 | 2.525 | 1.235 | 2.371  | Remorin, C-terminal region domain               |

|                        |              |       |       |        |                                                    |
|------------------------|--------------|-------|-------|--------|----------------------------------------------------|
| Os.15830.1.S1_at       | Os05g0475400 | 2.510 | 2.563 | 1.503  | Alanine:glyoxylate aminotransferase-like           |
| Os.55259.1.S1_at       | Os04g0395800 | 2.508 | 0.760 | 6.765  | ZIM domain containing protein                      |
| Os.4618.1.S1_at        | Os01g0510200 | 2.477 | 2.457 | 1.254  | Conserved hypothetical protein                     |
| Os.44546.1.A1_x_at     | Os07g0129700 | 2.445 | 1.572 | 4.292  | OSH15 protein (Homeobox gene)                      |
| Os.37729.1.S1_s_at     | Os01g0124200 | 2.440 | 1.241 | 4.928  | Bowman Birk trypsin inhibitor                      |
| Os.54671.1.S1_at       | Os08g0277200 | 2.434 | 1.278 | 8.254  | Cinnamoyl-CoA reductase                            |
| Os.18572.1.S1_at       | Os04g0613000 | 2.428 | 1.544 | 0.757  | Zinc transporter ZIP1                              |
| Os.14882.1.S1_at       | Os12g0116600 | 2.426 | 1.137 | 2.362  | Transcription factor                               |
| Os.4620.1.S1_at        | Os06g0318533 | 2.412 | 2.629 | 0.882  | Conserved hypothetical protein                     |
| OsAffx.14656.1.S1_at   | Os05g0214300 | 2.409 | 1.011 | 0.890  | MtN3 and saliva related transmembrane protein      |
| Os.53604.1.S1_at       | Os03g0738600 | 2.406 | 1.337 | 3.250  | Lipoxygenase L-2                                   |
| Os.50104.1.S1_at       | Os06g0604300 | 2.397 | 1.066 | 3.511  | Phospholipase D                                    |
| Os.9421.1.S1_at        | Os10g0191300 | 2.388 | 1.413 | 1.431  | PR-1a pathogenesis related protein                 |
| Os.52178.1.S1_at       | Os11g0604400 | 2.368 | 1.649 | 1.052  | Conserved hypothetical protein                     |
| OsAffx.3569.1.S1_at    | Os03g0718800 | 2.342 | 1.194 | 4.310  | Physical impedance induced protein                 |
| Os.50053.1.A1_at       | Os07g0154100 | 2.305 | 0.686 | 21.813 | Similar to Viviparous-14                           |
| Os.4163.1.S1_at        | Os01g0302500 | 2.300 | 0.774 | 3.005  | Knotted1-type homeobox protein OSH6                |
| Os.26849.1.S1_at       | Os08g0168000 | 2.269 | 0.995 | 1.490  | Terpenoid cylases                                  |
| OsAffx.30149.1.S1_s_at | Os09g0531600 | 2.269 | 1.429 | 1.272  | DUF702 family protein                              |
| Os.49799.1.S1_at       | Os08g0248100 | 2.260 | 1.005 | 3.753  | Protein kinase-like domain containing protein      |
| OsAffx.13633.1.S1_at   | Os04g0121100 | 2.255 | 1.204 | 1.079  | Peptidase S8 and S53, subtilisin, kexin, sedolisin |
| Os.5318.1.S1_a_at      | Os10g0576600 | 2.241 | 1.500 | 2.204  | Tetratricopeptide region domain containing protein |
| OsAffx.17872.1.S1_s_at | Os09g0409100 | 2.226 | 1.826 | 1.246  | Conserved hypothetical protein                     |
| OsAffx.15538.1.S1_at   | Os06g0320200 | 2.225 | 0.937 | 1.254  | Glycoside hydrolase                                |
| Os.6219.1.S1_at        | Os04g0536300 | 2.224 | 1.029 | 1.531  | Yabby15 protein                                    |
| Os.10083.1.S1_at       | Os04g0592600 | 2.222 | 1.022 | 2.361  | Conserved hypothetical protein                     |

|                        |              |       |       |        |                                                |
|------------------------|--------------|-------|-------|--------|------------------------------------------------|
| OsAffx.3569.1.S1_x_at  | Os03g0718800 | 2.213 | 1.153 | 4.360  | Conserved hypothetical protein                 |
| Os.51532.1.S1_at       | Os12g0154700 | 2.207 | 2.271 | 2.463  | Nectarin 1 precursor                           |
| Os.11510.1.S1_at       | Os09g0491100 | 2.206 | 2.168 | 1.038  | Conserved hypothetical protein                 |
| Os.52874.1.S1_at       | Os08g0112900 | 2.203 | 1.085 | 1.519  | Beta-primeverosidase                           |
| Os.8673.1.S1_at        | Os11g0306400 | 2.197 | 1.522 | 1.585  | Herbicide safener binding protein              |
| OsAffx.19456.1.A1_at   | Os12g0113600 | 2.196 | 3.417 | 0.977  | Conserved hypothetical protein                 |
| Os.10435.1.S1_at       | Os03g0836800 | 2.194 | 1.507 | 1.704  | IAA-amino acid hydrolase 1                     |
| Os.1564.1.S1_at        | Os01g0327500 | 2.183 | 1.001 | 1.238  | Conserved hypothetical protein                 |
| OsAffx.14326.1.S1_s_at | Os04g0574200 | 2.178 | 1.562 | 0.933  | Beta-Ig-H3/fasciclin domain containing protein |
| Os.2867.1.A1_at        | Os11g0684000 | 2.165 | 0.886 | 6.440  | Transcription factor MYB21                     |
| Os.55363.1.S1_at       | Os07g0592100 | 2.163 | 1.040 | 7.340  | Alcohol dehydrogenase-like protein             |
| Os.22935.1.S1_at       | Os05g0211100 | 2.162 | 1.144 | 8.215  | Cytochrome P450-like protein                   |
| Os.21260.1.S1_at       | Os03g0184100 | 2.143 | 1.186 | 1.635  | Conserved hypothetical protein                 |
| Os.50790.1.S1_at       | Os03g0733600 | 2.138 | 1.342 | 1.021  | SSXT family protein                            |
| Os.47815.1.A1_at       | Os12g0484900 | 2.137 | 1.057 | 0.764  | Growth-regulating factor 7                     |
| Os.3697.1.S1_at        | Os06g0112100 | 2.136 | 1.252 | 1.959  | Conserved hypothetical protein                 |
| OsAffx.7246.1.S1_x_at  | Os11g0483000 | 2.132 | 0.951 | 3.585  | Cytochrome P450 family protein                 |
| Os.29290.1.S1_at       | Os01g0183300 | 2.132 | 1.364 | 4.429  | Endonuclease                                   |
| Os.23221.1.A1_at       | Os12g0289600 | 2.130 | 1.956 | 0.583  | Conserved hypothetical protein                 |
| OsAffx.6015.1.S1_at    | Os08g0434500 | 2.121 | 1.871 | 1.068  | Conserved hypothetical protein                 |
| Os.5124.1.S1_at        | Os05g0573300 | 2.116 | 0.988 | 7.006  | CTP synthase 1                                 |
| Os.48082.1.S1_at       | Os09g0417800 | 2.107 | 0.923 | 3.594  | WRKY transcription factor 62                   |
| Os.54936.1.S1_at       | Os03g0790500 | 2.107 | 0.827 | 13.109 | Esterase/lipase/thioesterase domain containing |
| Os.9661.1.S1_at        | Os03g0139500 | 2.105 | 1.201 | 1.390  | CONSTANS-like protein CO9                      |
| OsAffx.23247.1.S1_at   | Os01g0248701 | 2.100 | 0.787 | 3.927  | Polyprenyl synthetase family protein           |
| Os.467.1.S1_a_at       | Os01g0609300 | 2.084 | 1.385 | 5.683  | PDR-like ABC transporter                       |
| Os.19971.1.S1_at       | Os05g0498800 | 2.081 | 2.053 | 0.876  | Transposase                                    |

|                        |              |       |       |       |                                                                            |
|------------------------|--------------|-------|-------|-------|----------------------------------------------------------------------------|
| OsAffx.5147.1.S1_at    | Os06g0700650 | 2.078 | 0.970 | 5.048 | ATPase, P-type cation/H <sup>+</sup> transporter                           |
| Os.53795.1.S1_at       | Os03g0187400 | 2.076 | 1.064 | 4.179 | Zinc finger, FYVE/PHD-type domain                                          |
| Os.38638.1.S1_at       | Os06g0142200 | 2.070 | 1.925 | 3.896 | Early nodulin                                                              |
| Os.32298.1.S1_at       | Os03g0187800 | 2.063 | 2.086 | 1.666 | DUF250 domain                                                              |
| OsAffx.32315.1.A1_at   | Os08g0252200 | 2.061 | 1.271 | 1.653 | Photosystem II P680 chlorophyll Aapoprotein (CP-47 protein)                |
| Os.54672.1.S1_at       | Os03g0318400 | 2.059 | 1.828 | 3.109 | Peptidase A1                                                               |
| Os.51382.1.S1_at       | Os01g0954100 | 2.050 | 1.307 | 2.327 | Conserved hypothetical protein                                             |
| OsAffx.14888.1.S1_at   | Os05g0368000 | 2.050 | 0.659 | 3.096 | Conserved hypothetical protein                                             |
| Os.11770.1.S1_at       | Os07g0677400 | 2.050 | 1.525 | 1.139 | Peroxidase                                                                 |
| Os.56950.1.S1_at       | Os05g0163900 | 2.047 | 2.073 | 6.075 | helix-loop-helix dimerisation region bHLH                                  |
| Os.14532.1.S1_at       | Os12g0113600 | 2.037 | 2.105 | 1.574 | Conserved hypothetical protein                                             |
| Os.26927.1.S1_at       | Os07g0637000 | 2.035 | 1.081 | 1.697 | CBL-interacting serine/threonine-protein (SOS2-like protein kinase PKS13)  |
| Os.20238.1.S1_s_at     | Os02g0584200 | 2.033 | 1.529 | 3.274 | Conserved hypothetical protein                                             |
| Os.23207.1.S1_at       | Os08g0137800 | 2.021 | 1.908 | 2.719 | Conserved hypothetical protein                                             |
| Os.16282.1.A1_at       | Os06g0567200 | 2.017 | 1.385 | 0.504 | Cupredoxin domain containing protein                                       |
| OsAffx.26801.1.S1_x_at | Os05g0186900 | 2.014 | 0.847 | 0.796 | Conserved hypothetical protein                                             |
| Os.36264.1.S1_x_at     | Os01g0739700 | 2.013 | 1.296 | 1.509 | Glycoside hydrolase                                                        |
| Os.32459.2.S1_x_at     | Os01g0123900 | 2.007 | 0.848 | 2.978 | Bowman-Birk type proteinase inhibitor                                      |
| Os.14153.3.S1_x_at     | Os05g0111300 | 2.004 | 1.362 | 1.875 | B22EL8 protein                                                             |
| Os.54966.1.S1_at       | Os06g0691400 | 2.001 | 1.152 | 5.194 | IAA-amino acid conjugate hydrolase-like                                    |
| OsAffx.11145.1.S1_s_at | Os01g0318400 | 2.001 | 1.078 | 0.444 | Conserved hypothetical protein                                             |
| Os.19229.1.S1_a_at     | Os03g0639300 | 0.499 | 1.105 | 0.255 | Conserved hypothetical protein                                             |
| Os.51117.1.S1_at       | Os08g0359200 | 0.498 | 0.913 | 0.228 | Lipid phosphate phosphatase 2                                              |
| OsAffx.28017.1.S1_at   | Os06g0601600 | 0.498 | 0.953 | 0.344 | Basic-leucine zipper (bZIP) transcription factor domain containing protein |

|                      |              |       |       |        |                                                    |
|----------------------|--------------|-------|-------|--------|----------------------------------------------------|
| Os.2019.1.S1_at      | Os01g0700100 | 0.497 | 1.373 | 0.540  | MtN3 and saliva related transmembrane protein      |
| Os.9900.1.S1_at      | Os06g0587401 | 0.496 | 0.970 | 1.248  | hypothetical protein                               |
| Os.54440.1.S1_at     | Os04g0623200 | 0.496 | 1.133 | 0.184  | Conserved hypothetical protein                     |
| Os.27810.1.S1_at     | Os07g0162600 | 0.495 | 1.052 | 0.516  | hypothetical protein                               |
| Os.14125.1.S1_at     | Os09g0522200 | 0.495 | 1.277 | 0.058  | DRE-binding protein 1A                             |
| Os.10972.1.S1_at     | Os01g0878700 | 0.495 | 1.136 | 0.223  | Amino acid/polyamine transporter II family protein |
| Os.15284.1.S1_at     | Os07g0680600 | 0.495 | 1.022 | 0.328  | Conserved hypothetical protein                     |
| OsAffx.31986.1.S1_at | Os12g0510750 | 0.494 | 0.738 | 0.921  | Conserved hypothetical protein                     |
| Os.11253.1.S1_at     | Os01g0850900 | 0.493 | 1.111 | 1.442  | SOUL heme-binding protein family protein           |
| Os.49619.1.S1_at     | Os03g0315400 | 0.492 | 0.951 | 0.339  | Similar to Typical P-type R2R3 Myb protein         |
| Os.33741.1.S1_at     | Os07g0224900 | 0.492 | 1.178 | 0.343  | WD40-like domain containing protein                |
| Os.27430.1.S1_at     | Os08g0183900 | 0.492 | 1.067 | 0.308  | NAD-dependent epimerase/dehydratase family protein |
| OsAffx.15319.1.S1_at | Os06g0187500 | 0.492 | 0.845 | 0.363  | UDP-glucuronosyl/UDP-glucosyltransferase family    |
| Os.26957.1.A1_a_at   | Os08g0200600 | 0.491 | 0.755 | 0.714  | Similar to NAC-domain containing protein 21/22     |
| Os.40021.1.S1_a_at   | Os03g0161900 | 0.491 | 0.649 | 10.933 | Similar to Heat shock factor 1                     |
| Os.12206.1.S1_at     | Os07g0124100 | 0.489 | 0.950 | 0.726  | Phytosulfokines 4 precursor                        |
| Os.48724.1.S1_at     | Os08g0401500 | 0.488 | 1.050 | 0.337  | Similar to HOTHEAD protein precursor               |
| Os.32374.2.S1_at     | Os01g0719250 | 0.488 | 1.215 | 0.236  | Conserved hypothetical protein                     |
| Os.51273.1.S1_at     | Os02g0609000 | 0.488 | 0.840 | 0.451  | Conserved hypothetical protein                     |
| Os.1411.1.S1_at      | Os01g0206700 | 0.486 | 1.241 | 0.210  | Similar to Serine/threonine protein kinase         |
| Os.14885.1.S1_at     | Os05g0510100 | 0.485 | 1.022 | 1.760  | unknown function DUF567 family protein             |
| Os.53428.1.S1_at     | Os09g0433800 | 0.484 | 1.082 | 0.139  | Senescence-associated protein SAG102               |
| Os.4775.1.S1_at      | Os01g0136200 | 0.484 | 0.843 | 0.850  | 16.9 kDa class I heat shock protein                |
| Os.25639.1.S1_at     | Os04g0352400 | 0.482 | 0.714 | 11.040 | Peptidylprolyl isomerase                           |
| Os.32596.3.S1_x_at   | Os01g0944100 | 0.482 | 1.147 | 2.564  | Conserved hypothetical protein                     |

|                       |              |       |       |       |                                                         |
|-----------------------|--------------|-------|-------|-------|---------------------------------------------------------|
| Os.7665.1.S1_at       | Os04g0657500 | 0.481 | 1.182 | 0.128 | Lipase, class 3 family protein                          |
| Os.4679.1.S1_at       | Os06g0133200 | 0.481 | 1.194 | 0.251 | Conserved hypothetical protein                          |
| Os.12110.1.S1_at      | Os11g0118300 | 0.480 | 1.812 | 0.748 | NPH3 domain containing protein                          |
| OsAffx.4280.2.A1_at   | Os05g0181700 | 0.480 | 1.141 | 0.379 | Conserved hypothetical protein                          |
| Os.7879.2.S1_at       | Os04g0659100 | 0.480 | 0.973 | 0.525 | Glutamine synthetase shoot isozyme                      |
| Os.15671.1.A2_at      | Os11g0644800 | 0.479 | 1.416 | 0.210 | Aminotransferase                                        |
| OsAffx.4677.1.S1_s_at | Os05g0582000 | 0.478 | 0.961 | 0.351 | Conserved hypothetical protein                          |
| Os.49287.1.S1_x_at    | Os04g0542000 | 0.478 | 1.326 | 0.215 | HAT dimerisation domain containing protein              |
| Os.34087.2.A1_at      | Os01g0650100 | 0.476 | 1.389 | 0.206 | unknown                                                 |
| Os.32177.1.S1_at      | Os05g0586600 | 0.475 | 1.053 | 1.612 | Plastid sigma factor SIG5                               |
| Os.26838.1.S1_at      | Os04g0592500 | 0.475 | 1.081 | 0.362 | Phosphoenolpyruvate carboxykinase (ATP) family protein  |
| Os.8468.1.S1_at       | Os12g0438400 | 0.475 | 1.511 | 0.157 | Hypothetical protein                                    |
| Os.27755.1.S1_at      | Os07g0539900 | 0.475 | 1.180 | 0.511 | Beta-1,3-glucanase-like protein                         |
| Os.26811.1.A1_at      | Os06g0599200 | 0.474 | 0.807 | 0.707 | Cytochrome P450 family protein                          |
| Os.8044.1.S1_at       | Os02g0206100 | 0.473 | 1.293 | 0.253 | UDP-glucuronosyl/UDP-glucosyltransferase family protein |
| Os.1977.1.S1_a_at     | Os01g0114300 | 0.473 | 1.085 | 0.373 | Protein kinase-like domain containing protein           |
| Os.15641.1.S1_at      | Os01g0965900 | 0.468 | 1.166 | 0.545 | Conserved hypothetical protein                          |
| Os.49564.1.S1_at      | Os04g0412100 | 0.468 | 0.979 | 0.483 | Conserved hypothetical protein                          |
| Os.27659.1.S1_x_at    | Os01g0179800 | 0.467 | 0.974 | 0.156 | TMS membrane protein                                    |
| Os.9276.1.S1_s_at     | Os07g0175300 | 0.467 | 1.295 | 0.204 | Conserved hypothetical protein                          |
| Os.37051.1.S1_at      | Os06g0591400 | 0.465 | 1.195 | 0.265 | Conserved hypothetical protein                          |
| Os.9138.1.S1_at       | Os09g0535500 | 0.465 | 0.970 | 0.295 | RING-H2 finger protein ATL1R                            |
| Os.10556.1.S1_at      | Os02g0258800 | 0.464 | 0.930 | 0.200 | Conserved hypothetical protein                          |
| Os.7507.1.S1_at       | Os10g0118200 | 0.463 | 1.228 | 0.248 | O-methyltransferase ZRP4                                |
| Os.57354.1.S1_at      | Os04g0660000 | 0.460 | 1.133 | 0.333 | Conserved hypothetical protein                          |

|                        |              |       |       |        |                                                                        |
|------------------------|--------------|-------|-------|--------|------------------------------------------------------------------------|
| Os.11150.1.S1_at       | Os03g0439700 | 0.459 | 1.043 | 0.323  | unknown function DUF1230 family protein                                |
| Os.11046.1.S1_at       | Os06g0592500 | 0.458 | 0.660 | 27.302 | Similar to Ethylene-responsive transcriptional coactivator             |
| Os.37837.1.A1_at       | Os01g0904200 | 0.458 | 1.493 | 0.202  | protein kinase-like domain containing protein                          |
| Os.7007.1.S1_at        | Os02g0213100 | 0.457 | 0.844 | 0.551  | Conserved hypothetical protein                                         |
| Os.26552.1.S1_at       | Os10g0539700 | 0.456 | 1.541 | 0.267  | Conserved hypothetical protein                                         |
| Os.49287.1.S1_at       | Os04g0542000 | 0.456 | 1.633 | 0.186  | HAT dimerisation domain containing protein                             |
| Os.56880.1.S1_at       | Os01g0542700 | 0.455 | 1.477 | 0.579  | Eukaryotic transcription factor                                        |
| Os.56275.1.S1_x_at     | Os10g0560400 | 0.454 | 1.560 | 0.512  | CONSTANS-like protein CO9                                              |
| Os.55886.1.S1_at       | Os01g0765600 | 0.453 | 0.950 | 0.228  | EF-Hand type domain containing protein                                 |
| Os.25171.1.A1_at       | Os11g0695850 | 0.452 | 0.965 | 0.277  | EGF-like, type 3 domain containing protein                             |
| OsAffx.23090.2.S1_x_at | Os01g0117500 | 0.451 | 1.003 | 0.451  | LRK14                                                                  |
| Os.18378.1.S1_s_at     | Os10g0335000 | 0.451 | 0.846 | 0.562  | Conserved hypothetical protein                                         |
| Os.35559.1.S1_at       | Os05g0495700 | 0.446 | 0.892 | 0.377  | Glycerol-3-phosphate dehydrogenase-like protein                        |
| Os.10583.1.S1_s_at     | Os06g0141200 | 0.446 | 0.784 | 0.297  | RNA-binding protein EWS                                                |
| Os.11945.1.S1_at       | Os08g0386200 | 0.445 | 1.025 | 0.512  | WRKY transcription factor 69                                           |
| OsAffx.5232.1.S1_s_at  | Os07g0158400 | 0.444 | 1.249 | 0.302  | GCK domain containing protein                                          |
| Os.55270.1.S1_s_at     | Os04g0634800 | 0.443 | 1.022 | 0.486  | Conserved hypothetical protein                                         |
| Os.13999.1.S1_at       | Os02g0178100 | 0.443 | 1.517 | 0.394  | CCT domain containing protein                                          |
| Os.12082.1.S1_at       | Os04g0469000 | 0.440 | 1.308 | 0.777  | Heavy metal transport/detoxification protein domain containing protein |
| Os.17762.1.S1_at       | Os06g0494400 | 0.438 | 1.122 | 0.361  | Multi antimicrobial extrusion protein MatE family protein              |
| Os.56184.1.S1_at       | Os04g0480200 | 0.438 | 1.358 | 0.424  | Fibronectin                                                            |
| OsAffx.14410.1.S1_s_at | Os04g0635000 | 0.437 | 0.837 | 0.364  | Conserved hypothetical protein                                         |
| Os.7017.1.S1_at        | Os01g0364800 | 0.433 | 0.944 | 0.487  | EGF-like calcium-binding domain containing protein                     |

|                        |              |       |       |       |                                                    |
|------------------------|--------------|-------|-------|-------|----------------------------------------------------|
| Os.6976.2.A1_at        | Os09g0304800 | 0.430 | 0.829 | 0.336 | Conserved hypothetical protein                     |
| Os.6651.1.S1_at        | Os07g0630400 | 0.429 | 1.112 | 0.439 | Ribonuclease T2 family protein                     |
| Os.12007.1.S1_at       | Os03g0364400 | 0.428 | 1.351 | 0.225 | Phytosulfokine receptor-like protein               |
| Os.51583.1.S1_at       | Os12g0420400 | 0.425 | 1.220 | 0.303 | Photosystem I reaction center subunit XI           |
| Os.28964.1.S1_at       | Os01g0613800 | 0.424 | 1.142 | 0.770 | Peptidase C1A, papain family protein               |
| Os.5816.1.S1_at        | Os09g0522000 | 0.421 | 1.066 | 0.045 | Similar to CBF-like protein                        |
| Os.4921.1.S1_at        | Os12g0222300 | 0.421 | 0.656 | 0.401 | Hypothetical protein                               |
| Os.51022.1.A1_at       | Os09g0471400 | 0.421 | 1.038 | 0.275 | Protein kinase-like domain containing protein      |
| Os.11602.1.S1_at       | Os09g0553900 | 0.420 | 1.446 | 0.112 | Conserved hypothetical protein                     |
| Os.53728.1.S1_at       | Os09g0482640 | 0.420 | 0.744 | 0.353 | EGF-like calcium-binding domain containing protein |
| Os.50969.1.S1_at       | Os03g0664400 | 0.419 | 1.169 | 0.304 | Expressed protein                                  |
| Os.14101.3.S1_at       | Os12g0137100 | 0.419 | 1.097 | 0.224 | Annexin, type VII family protein                   |
| Os.11244.3.S1_x_at     | Os06g0133000 | 0.419 | 1.290 | 0.332 | Granule-bound starch synthase I                    |
| Os.33350.1.S1_x_at     | Os07g0407700 | 0.416 | 1.114 | 0.250 | Hypothetical protein                               |
| Os.53177.1.S1_at       | Os06g0206900 | 0.415 | 0.942 | 1.045 | Conserved hypothetical protein                     |
| Os.18814.1.S1_at       | Os11g0597700 | 0.408 | 1.558 | 0.259 | Conserved hypothetical protein                     |
| Os.28124.1.S1_at       | Os10g0416500 | 0.406 | 1.163 | 0.555 | Similar to Chitinase 1 precursor                   |
| OsAffx.25073.1.S1_x_at | Os03g0228200 | 0.404 | 1.114 | 0.061 | Conserved hypothetical protein                     |
| Os.26900.1.A1_at       | Os09g0339000 | 0.403 | 0.828 | 0.494 | Protein kinase-like domain containing protein      |
| Os.4863.1.S1_at        | Os01g0631200 | 0.402 | 1.575 | 0.126 | Similar to Uroporphyrinogen III methyltransferase  |
| Os.49503.1.S1_at       | Os03g0388500 | 0.402 | 1.023 | 0.579 | Similar to Anther ethylene-upregulated protein ER1 |
| Os.52820.1.S1_at       | Os11g0416900 | 0.400 | 0.669 | 0.458 | ABC transporter related domain containing protein  |
| Os.51145.1.S1_at       | Os11g0566800 | 0.396 | 0.628 | 0.292 | Similar to Bibenzyl synthase                       |
| Os.1478.1.S1_at        | Os03g0307300 | 0.396 | 1.374 | 0.306 | Nicotianamine synthase 1                           |
| Os.16245.1.S1_at       | Os03g0293000 | 0.394 | 0.737 | 9.031 | Thioredoxin fold domain containing protein         |

|                        |              |       |       |        |                                                                  |
|------------------------|--------------|-------|-------|--------|------------------------------------------------------------------|
| Os.18955.1.S1_at       | Os06g0728700 | 0.393 | 0.954 | 2.497  | Homeodomain-like containing protein                              |
| OsAffx.24280.2.S1_at   | Os07g0178700 | 0.385 | 0.950 | 0.474  | Similar to Low molecular mass early light-inducible protein HV90 |
| Os.23635.1.S1_at       | Os01g0847100 | 0.384 | 1.363 | 0.382  | Conserved hypothetical protein                                   |
| OsAffx.17798.1.S1_at   | Os09g0369400 | 0.382 | 0.890 | 0.082  | Similar to Trehalose-6-phosphate phosphatase                     |
| Os.27036.1.S1_at       | Os04g0307500 | 0.382 | 0.887 | 0.281  | EGF-like calcium-binding domain containing protein               |
| Os.20531.1.S1_at       | Os04g0632600 | 0.381 | 0.619 | 0.288  | Similar to Receptor-like protein kinase 5                        |
| Os.15854.1.S1_at       | Os07g0543300 | 0.381 | 1.574 | 0.234  | Conserved hypothetical protein                                   |
| Os.10751.1.S1_at       | Os10g0560400 | 0.379 | 1.541 | 0.337  | CONSTANS-like protein CO9                                        |
| Os.4717.1.S1_at        | Os08g0468100 | 0.379 | 1.314 | 0.025  | Nitrate reductase [NADH] 1                                       |
| OsAffx.13282.1.S1_s_at | Os03g0609500 | 0.375 | 0.976 | 0.224  | LOB domain protein 39                                            |
| Os.47474.1.S1_at       | Os06g0650900 | 0.372 | 0.664 | 1.562  | Heat shock protein DnaJ family protein                           |
| Os.11039.1.S1_s_at     | Os04g0107900 | 0.372 | 0.374 | 23.896 | Similar to Heat shock protein 80                                 |
| Os.12112.1.S1_at       | Os01g0823600 | 0.368 | 1.394 | 0.577  | Conserved hypothetical protein                                   |
| Os.52451.1.A1_at       | Os09g0457900 | 0.366 | 0.663 | 0.129  | Similar to AP2 domain containing protein RAP2.6                  |
| Os.33350.1.S1_at       | Os07g0407700 | 0.364 | 1.206 | 0.237  | Hypothetical protein                                             |
| Os.50830.1.S1_at       | Os09g0414500 | 0.359 | 0.933 | 0.115  | Similar to ZF-HD homeobox protein                                |
| Os.21524.1.S1_at       | Os10g0149000 | 0.357 | 0.305 | 0.870  | unknown function DUF1210 family protein                          |
| Os.28427.1.S2_a_at     | Os05g0217800 | 0.355 | 1.080 | 0.364  | BURP domain containing protein                                   |
| Os.54146.1.S1_at       | Os02g0770800 | 0.354 | 1.517 | 0.090  | Similar to Nitrate reductase                                     |
| OsAffx.11989.2.S1_s_at | Os02g0206700 | 0.350 | 1.337 | 0.294  | UDP-glucuronosyl/UDP-glucosyltransferase family                  |
| Os.9445.1.S1_at        | Os04g0635100 | 0.350 | 1.050 | 0.169  | Conserved hypothetical protein                                   |
| Os.17916.1.S1_at       | Os05g0217700 | 0.349 | 1.186 | 0.051  | Conserved hypothetical protein                                   |
| Os.30376.1.S1_at       | Os01g0111700 | 0.349 | 1.667 | 0.660  | Conserved hypothetical protein                                   |
| Os.46574.1.S1_at       | Os10g0570200 | 0.346 | 0.850 | 0.774  | Similar to RIR1b protein precursor                               |
| Os.6976.1.S1_s_at      | Os03g0126000 | 0.344 | 0.325 | 0.976  | Similar to Phosphorybosyl anthranilate                           |

|                        |              |       |       |       |                                                                  |
|------------------------|--------------|-------|-------|-------|------------------------------------------------------------------|
|                        |              |       |       |       | transferase 1                                                    |
| Os.55740.1.S1_at       | Os06g0671300 | 0.340 | 0.491 | 0.613 | Cytochrome P450 family protein                                   |
| Os.28011.1.S1_at       | Os06g0493100 | 0.338 | 0.578 | 0.658 | Conserved hypothetical protein                                   |
| Os.10280.1.A1_at       | Os02g0137700 | 0.333 | 1.420 | 0.806 | Conserved hypothetical protein                                   |
| Os.35583.1.S1_at       | Os01g0681800 | 0.322 | 1.136 | 0.387 | Conserved hypothetical protein                                   |
| Os.45516.1.S1_at       | Os01g0117200 | 0.320 | 1.079 | 0.274 | Similar to ARK protein                                           |
| Os.23327.2.S1_a_at     | Os10g0180800 | 0.307 | 0.533 | 0.156 | EGF domain containing protein                                    |
| Os.52627.1.S1_at       | Os08g0351300 | 0.289 | 0.776 | 0.316 | Hypothetical protein                                             |
| OsAffx.15178.1.S1_s_at | Os05g0579600 | 0.279 | 1.283 | 0.091 | Homeodomain-like containing protein                              |
| Os.6764.1.S1_at        | Os04g0635600 | 0.272 | 0.818 | 0.085 | Conserved hypothetical protein                                   |
| Os.171.1.S1_at         | Os01g0660200 | 0.250 | 1.183 | 0.679 | Acidic class III chitinase OsChib3a precursor                    |
| Os.15516.1.S1_at       | Os04g0370900 | 0.245 | 0.671 | 0.503 | Conserved hypothetical protein                                   |
| Os.26732.1.S1_at       | Os01g0175700 | 0.245 | 0.934 | 0.261 | UDP-glucuronosyl/UDP-glucosyltransferase family protein          |
| Os.57519.1.S1_x_at     | Os01g0246400 | 0.244 | 1.000 | 1.145 | hypothetical protein                                             |
| Os.15285.1.S1_a_at     | Os01g0369000 | 0.238 | 0.238 | 0.856 | Similar to Cullin-1                                              |
| Os.35456.1.S1_at       | Os06g0582600 | 0.238 | 0.672 | 0.324 | Similar to Cysteine proteinase                                   |
| Os.9191.1.S1_s_at      | Os01g0246400 | 0.231 | 1.110 | 1.059 | Similar to Low molecular mass early light-inducible protein HV90 |
| Os.6867.1.S1_x_at      | Os12g0628600 | 0.231 | 0.687 | 0.790 | Similar to Thaumatin-like pathogenesis-related                   |
| Os.12430.1.S1_at       | Os07g0142100 | 0.219 | 3.981 | 0.404 | Conserved hypothetical protein                                   |
| Os.39294.1.S1_at       | Os09g0471500 | 0.219 | 0.853 | 0.191 | Protein kinase-like domain containing protein                    |
| Os.57142.1.S1_at       | Os06g0671600 | 0.217 | 0.311 | 0.601 | Conserved hypothetical protein                                   |
| OsAffx.30449.1.S1_at   | Os10g0335000 | 0.190 | 0.807 | 0.227 | Conserved hypothetical protein                                   |
| Os.9762.2.S1_at        | Os08g0355600 | 0.142 | 0.700 | 0.224 | unknown                                                          |
| Os.53763.1.A1_at       | Os06g0581500 | 0.076 | 1.170 | 0.050 | Protein kinase-like domain containing protein                    |
