# Supplementary material for: OsGRAS23, a rice GRAS transcription factor gene, is involved in drought stress response through regulating expression of stress-responsive genes
Source: BMC Plant Biol. 2015 Jun 13;15:141. doi: 10.1186/s12870-015-0532-3 (PMC4465154; doi:10.1186/s12870-015-0532-3)
Supplement: Additional file 1: Figure S1. — Alignment of deduced amino acids of OsGRAS23 with the well-characterized GRAS family proteins. The lines above the alignment indicate the locations of proposed trans-activation motifs (NI and NII) and the conserved regions in the GRAS proteins were defined previously. The protein accession numbers are as follows: AtSCL9, AT2G37650; AtSCL14, AT1G07530; AtSHR, AT4G37450; AtLAS, AT1G55580; AtPAT1, AT5G48150; AtRGA1, AT2G01570; and OsSLR1, AC087797.5. [file 12870_2015_532_MOESM1_ESM.pdf]

AtRGA1 : -----MKRDHHQFQGRLSNHGTSSSSSSISKDKMMVKKEEDGGGNMDELLAVLGKVRSSSEMAEVALKLEQ : 68  
 OsSLR1 : -----MKREYQEAGG--SSGGSSADMGSCKDKVMAGAAGEED--VDELLAALGYKVRSSDMADVAQKLEQ : 63  
 AtSCL9 : MITEPS-LTGISGMVNRNRLSGLPDQSSHSFT-PVTLYDGFNYNLSSDHINTVVA-----APENSVEIREEEED : 70  
 OsGRAS23 : MLDS-----GSYDDVDYGDLESI PNPPAPHLNLF PLQFFPSNGFISSADDSHRS PAGMFGSTPSPTSTTTLENSED : 72  
 AtSCL14 : MGSYPDGFPGSMDELDFNKDFDLP- PSSNQTLLGLANGFYLDLDFSSLDPPPAYPSQNNNNNNINNKAVAG-DLLSS : 75  
 AtLAS : ----- : -  
 AtPAT1 : -----MYKQPRQELAYYFEENSVEKLRYLPVNNSRKRFTLEPF : 40  
 AtSHR : -----MDTLFRLVSLQQQQSSSIITNQSSLSRTSTTTTGSPTAYHYNFQNDVVVEECNFNFMDEEDL : 64

#### NI

AtRGA1 : LETMSN-----VQEDG-LSHLATDTVHYNPS-ELYSWLDNMLSELNP--PPLPASS----- : 116  
 OsSLR1 : LEMAMGMGGVSAPGAADDGFVSHLATDTVHYNPS-DLSSWVESMLSELNAPLPPIPPAP----- : 121  
 AtSCL9 : PADDPFDSDAVLGYISQMLNEEDMDKVCMLQESLDLEAAERSLYEALGKKYPPSPERN---LAFERNSEN--- : 139  
 OsGRAS23 : LSESAD--DAVLAYINQFLL-DEEDESCPG---TITSVEDSALLAVEKPFVDILTAS---QEACQENS-- : 132  
 AtSCL14 : SDDADFSDSVLYKISQVLMEEDMEEEKPCMFHDALALQAAEKSLYEALGEKYSSSSSSASSVDHPERLASDPDSCS : 152  
 AtLAS : ----- : -  
 AtPAT1 : P----- : 41  
 AtSHR : SS----- : 66

AtRGA1 : -----NGLDPVLPS-----PEICG-----FPASD : 135  
 OsSLR1 : -----PAARHASTS-----STVTGGGGSGFFELPAA : 148  
 AtSCL9 : -----LDRVVPGNYTGGDCIGFNGGKIPKSSGFTLDFR---NPQSCSSILSVQPSNGLITTYGDI-DESSKNRE : 207  
 OsGRAS23 : -----WIDSCCFTGNG-----GLLDTF-----TTTHAA : 156  
 AtSCL14 : GGAFSDYASTTTTTSSDSHWSVDGLNLRNPSWLHTPMPSNFVFPQSTSRNSVTVGGGGGNSAVYSGSGFDLLVSNMFK : 229  
 AtLAS : ----- : -  
 AtPAT1 : ----- : -  
 AtSHR : ----- : -

AtRGA1 : YDLKVI PGNAIYQ-----FPAID---SSSSNNQNKRLKSCS----- : 169  
 OsSLR1 : DSSSTYALRPIS-----LPVATADPSAADSARDTKRMRTGG----- : 186  
 AtSCL9 : NHQSVMLFRREIEEANRFNPEENELIVNFRENCVSKARKNSRDEICVEE----- : 259  
 OsGRAS23 : CQPAPECFEKE-----KGECAVHKGRKNPHDDCLLFEES----- : 191  
 AtSCL14 : DDELAMQFKKGVEEASKFLPKSSQLFIDVDSYIPMNSGSKENGSEVFKTEKKDTEHHHHHSYAPPNRLTGKSH : 306  
 AtLAS : -----MLTSFKSSSSSEDATATTEN----- : 22  
 AtPAT1 : -----DSPPYNALSTATYDDTCGSCVTDEN----- : 67  
 AtSHR : -----SSSHNNHNNNNNTYYSPFTTPT----- : 90

#### N II

AtRGA1 : -----SPDSMVTSTSTGQIGGVITTTT-----AAGESTRSVILVD----- : 213  
 OsSLR1 : -----GSTSSSSSSSSSLGGGASRGSVVEAAPATQGAANAAPVPPVVVD----- : 233  
 AtSCL9 : -----RSSKLPAVEGEDILRSDDVVDKILVHPG-GESEKFNALRDVLKKGVEKKKSAQGGKRRARG : 324  
 OsGRAS23 : -----RRSKQLAVSEETVVR-EMFDKVLICN---GECELRAPLPABARNCGVYV-----GSGNKRGRK : 246  
 AtSCL14 : WRDEDEDFVEERSNKQSAVYVEESELSEMDKILVCGPGKPVCLNQNFPTESAKVVTQAQ-----NGAKIRGK : 376  
 AtLAS : -----PPLCIASSSAATSASHHLRLRLFTAANFVSQSNFTAQNLSSILSLNSS----- : 72  
 AtPAT1 : -----DFKHKIREIETVMGPDSDLVVDCTDSFDTASQEINGWRSTLEAISRR----- : 117  
 AtSHR : -----QYHPATSSSTPSSIAAALASPYSSSGHHNDPSAFSIPQTTPSFDFS----- : 137

#### LEUCINE HEPTAD I

AtRGA1 : -----SQENGVRVHALMAABATQNNNTLEALVKQSCCLAVSQAGAMRKVATYEAARRIYR--- : 275  
 OsSLR1 : -----TQEAGIRVHALMAABAVQNNFAAALVKQETLAAASQCGAMRKVAAYGEAARVYR--- : 295  
 AtSCL9 : RGRGRGGGGGQNGKEVVDRSLLIHQAQAAADRRRCAGQLKQIRLHSTPFQGNQRLAHCPANGEARLAGTGS : 401  
 OsGRAS23 : KGKS-----GASAEDDAVDTTLLIHAQAQAADHHRNSNELKQIRQRSSAYSDAGORLAHCPANAEARLAGTGS : 318  
 AtSCL14 : STSTS---HSNDSKKETADRTLLVLAQAVSVDRRTNEMLRQIRHSHSPLENGSERLAHYEANSLEARLAGTGT : 450  
 AtLAS : -----PHGDSTERLVHETRLASLRIN-RQQQDQTAETVATNTNEMTMSNSTVFTSSVCKEQELFR--- : 133  
 AtPAT1 : -----DRADLVMSAKAMSENLMMAHSMHEKRLQMVSVSEPIQRLGAYLLEGVAGLASSGS : 176  
 AtSHR : -----ANAKWADSVLEAARFSDKQTAQAQILWTNELSSPYEDTEOKLASYLQALFNEMTGSGE : 200

1 L cA a a 6 q a f l r6

#### VHIID

AtRGA1 : --LSPPQ-NQIDH-----CLSDTLQMHYEYTCFYLKFAHFTANQAILEFEGKKR--VHVDFSSNQELQWELMQLA : 342  
 OsSLR1 : --ERPADSTLLDA-----AFADLLHAHVEYSCPYLKAHFTANQAILEFAGCHR--VHVDPGCKQEMQWELMQLA : 363  
 AtSCL9 : QIKGIVSKPRSA-----AAVLKAHQELACCPERRLSYFITKTRDLVGNSSQR--VHVDFGLLYEFQWETLTHR : 471  
 OsGRAS23 : NIKRSLAAKRTSV-----YDILNAFKLVTAACPKKISNFFSIEAILNLSKGMTR--LHIVDYGQYEFQWETLTHR : 388  
 AtSCL14 : QITALSSEKTS-----ADMLKAYQYMSVCPPKKAIIIFANHSMMRETANANT--IHIIDEGSYEFQWELTHR : 520  
 AtLAS : -----TKNNNS-----DFESCYLWLNQLTPEIRGHLTANQAILDATETNDNGALHILDLDSQELQWELMQLA : 198  
 AtPAT1 : SIKKALNRCPEPAS-----TELLSYMHLIYEVCPYFREGYSANGATAEAMKEENR--VHIIDFQNGQESQWETLQIA : 247  
 AtSHR : RCMRTMVTAAATEKTCSEFSTRKTVLKEQEVSPWATEGHVAANGAILEAVDGEAK--IHIIVDSSTFCTQWETLLEA : 275

cp5 an a6 a 6H6D g Qwp l

#### LEUCINE HEPTAD II

AtRGA1 : LALRE---GSEPTFRLTGIGPPAP--DNSDH---DHEVGCKLAQLAEAIHVEFYRGFVANSLADLDASMLELR- : 408  
 OsSLR1 : LALRP---GSEPSERLTGVGPPQP--DETDA---DQVVGKLAQEAHTIRVDFYRGLVAATLADLEPFMLQPEG : 430  
 AtSCL9 : FSMY---GSEPKVRLTGIEFPQPGFRPAQR---VEETGQRLAAAKLFGVFFYK-ALAKKWDATQLBDDLDNR : 537  
 OsGRAS23 : SKRP---GSEPSVRLTGVDLPQGFPAQL---EATGRRLHDYARMFNVEFYH-ALAAKWDTRVRLDLKIDK : 456  
 AtSCL14 : LSLSRP---GSEPKRLTGIELPQGFPAEG---VOETGHLRLARQCRHNVEFYH-ATAQKWETIQVLDLKRQ : 589  
 AtLAS : LAERSSNPSSPEPSRLTGCG--RDVTG---INRTGDLRLTREADSLGLOFHF-TLVIVEEDTAGLLLOLRP : 264  
 AtPAT1 : FAARP---GSEPRRLTGIDMTSAYARGG---LSIVGNRLAKLAKQFNVEFFN-SVSVSVSEYKPKNLGURP : 315  
 AtSHR : LATES---DDTEHRLTLTVVANKFVNDQTASHRMKEIGNRMEKEARLMGVVEEREN--LIHVGDSEFELNELD : 346

r q P R6Tq 6 G 46 a 6 F 5 6 6 L

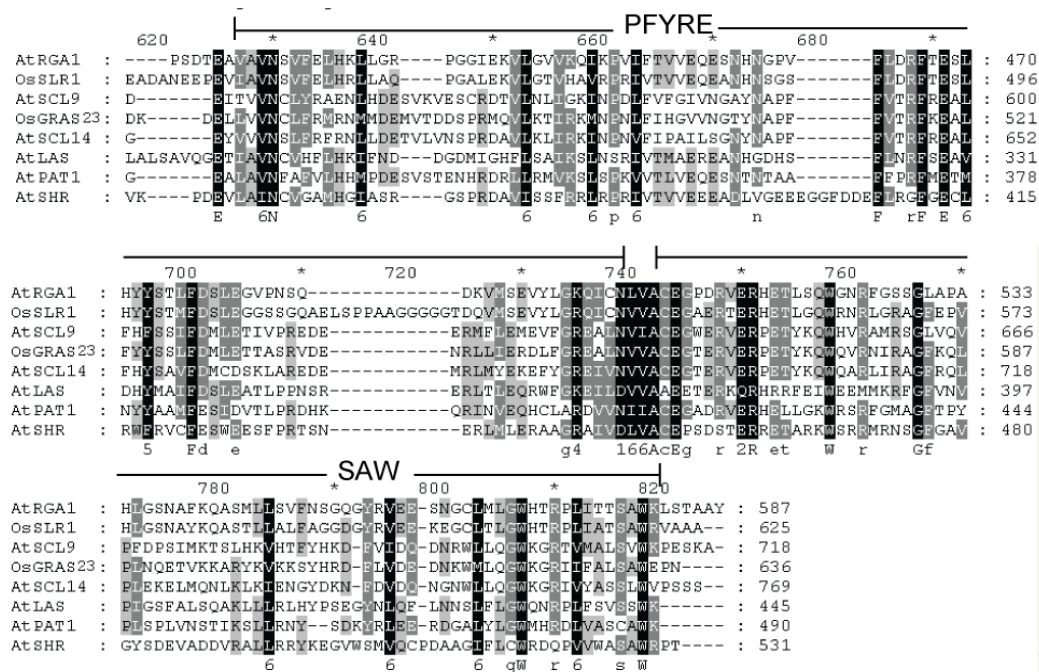

**Figure S1. Alignment of deduced amino acids of OsGRAS23 with the well-characterized GRAS family proteins.**
